# Supplementary material for: LncRNA JPX Promotes Esophageal Squamous Cell Carcinoma Progression by Targeting miR-516b-5p/VEGFA Axis
Source: MDPI journal article supplement (doi:10.3390/cancers14112713), 2022-05-31
Supplement: s1 [file s1]

**Supplementary Table S1. Correlation between JPX expression and clinicopathological characteristics of ESCC patients.**

| Clinicopathological parameter |          | JPX expression  |                | P-Value <sup>a</sup> |
|-------------------------------|----------|-----------------|----------------|----------------------|
|                               |          | High expression | Low expression |                      |
| Age (year)                    | <60      | 10              | 3              | 0.6972               |
|                               | ≥60      | 6               | 2              |                      |
| Gender                        | Female   | 3               | 2              | 0.4626               |
|                               | Male     | 13              | 3              |                      |
| Tumor location                | Upper    | 2               | 1              | 0.8886               |
|                               | Middle   | 6               | 2              |                      |
|                               | Lower    | 8               | 2              |                      |
| Tumor grade*                  | Well     | 0               | 2              | 0.0282               |
|                               | Moderate | 4               | 1              |                      |
|                               | Poor     | 12              | 2              |                      |
| TNM stage*                    | I        | 0               | 2              | 0.0159               |
|                               | II       | 6               | 0              |                      |
|                               | III      | 10              | 3              |                      |

<sup>a</sup> Chi-square test results, \*  $P < 0.05$ .
