# Supplementary material for: LncRNA JPX Promotes Esophageal Squamous Cell Carcinoma Progression by Targeting miR-516b-5p/VEGFA Axis
Source: MDPI journal article supplement (doi:10.3390/cancers14112713), 2022-05-31
Supplement: s1 [file s1]

**Supplementary Table S2. Primers used for qRT-PCR, siRNA, mimics sequences.**

| Name                                   | Sequence (5'-3')          |
|----------------------------------------|---------------------------|
| <b>qRT-PCR</b>                         |                           |
| JPX-F                                  | TTGCAAGGCGTCCGAAGTAT      |
| JPX-R                                  | TTGTACCACCGTCATCAGGC      |
| miR-516b-5p-F                          | CAGATCTGGAGGTAAGAAGCACTTT |
| miR-516b-5p-R                          | AAAGTGCTTCTTACCTCCAGATCTG |
| VEGFA-F                                | GGCAAAAACGAAAGCGCAAG      |
| VEGFA-R                                | ATTAGACAGCAGCGGGCAC       |
| GAPDH-F                                | GAGAAGGCTGGGGCTCATTT      |
| GAPDH-R                                | GAGAAGGCTGGGGCTCATTT      |
| U6-F                                   | GCAGACCGTTCGTCAACCTA      |
| U6-R                                   | AATTCTGTTTGCGGTGCGTC      |
| <b>siRNAs</b>                          |                           |
| si-NC (JPX)                            | GGAGAATAATTTCTTTCTUU      |
| si-JPX#1                               | GUGCUGAGCAGUUGUCAUAUU     |
| si-JPX#2                               | GCGAGACUCUGUCUCUAAAUU     |
| si-NC (VEGFA)                          | GCGAGAAGTGCTAGCTCGUU      |
| si-VEGFA#1                             | GGCAGCUUGAGUUAAACGAUU     |
| si-VEGFA#2                             | CGAGGCAGCUUGAGUUAAAUU     |
| <b>Mimics/control</b>                  |                           |
| miR-516b-5p mimics (sense)             | AUCUGGAGGUAAGAAGCACUUU    |
| miR-516b-5p mimics (antisense)         | AGUGCUUCUUACCUCCAGAUUU    |
| miR-516b-5p mimics control (sense)     | UGCUGCAACGUUUCACGATT      |
| miR-516b-5p mimics control (antisense) | UCGUGAAACGUUGCAAGCATT     |
