# Supplementary material for: LncRNA JPX Promotes Esophageal Squamous Cell Carcinoma Progression by Targeting miR-516b-5p/VEGFA Axis
Source: Cancers (Basel). 2022 May 31;14(11):2713. doi: 10.3390/cancers14112713 (PMC9179376; doi:10.3390/cancers14112713)
Supplement: Supplementary file 1 [file cancers-14-02713-s001.zip]

Archive with 4 entries (4 files):
- FigureS3 Original Western Blot.pdf
- Supplementary Figures  and legends.pdf
- Table S1.pdf
- Table S2.pdf
