# Supplementary figures and images for: LncRNA JPX Promotes Esophageal Squamous Cell Carcinoma Progression by Targeting miR-516b-5p/VEGFA Axis
Source: MDPI journal article supplement (doi:10.3390/cancers14112713), 2022-05-31

Figure S3 Original Western Blot

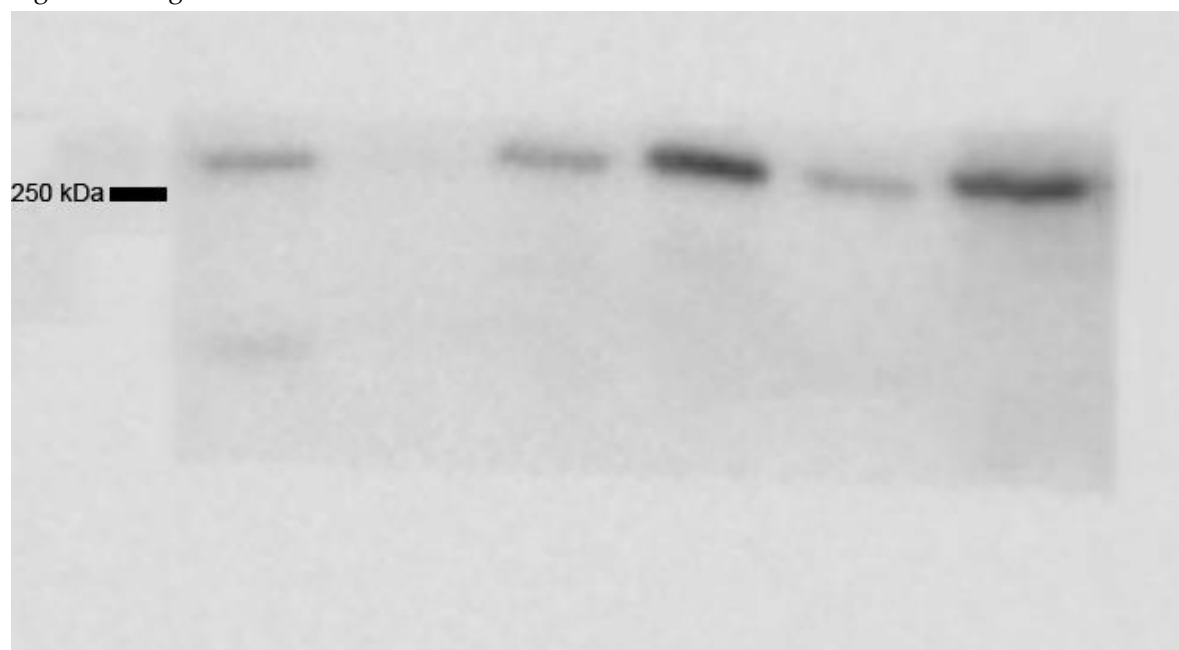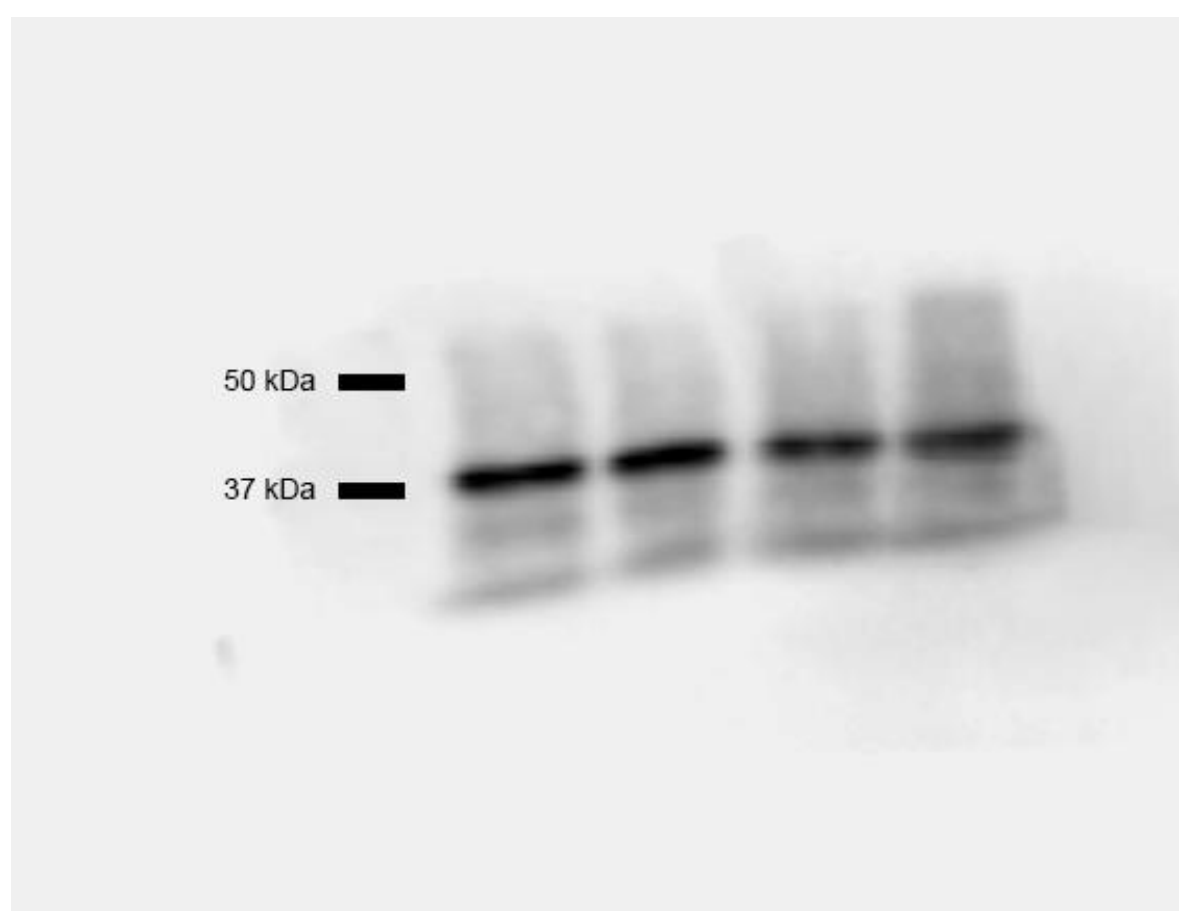

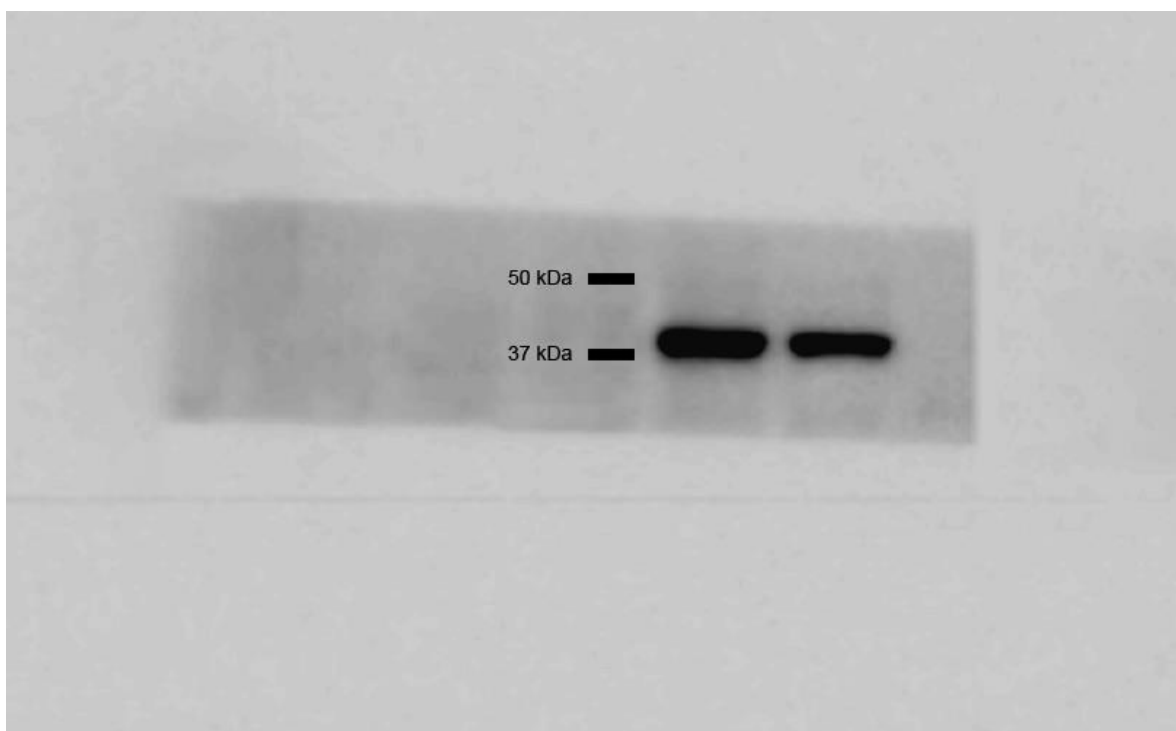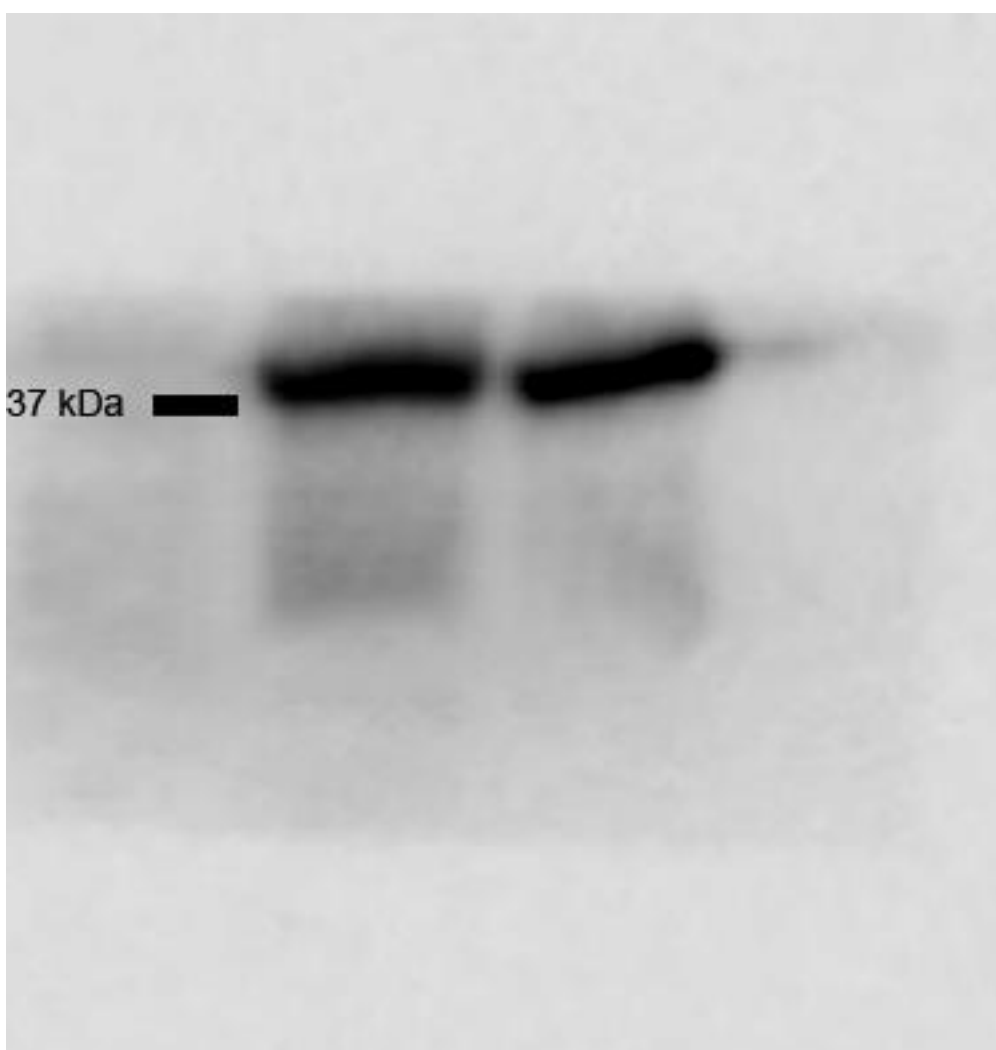

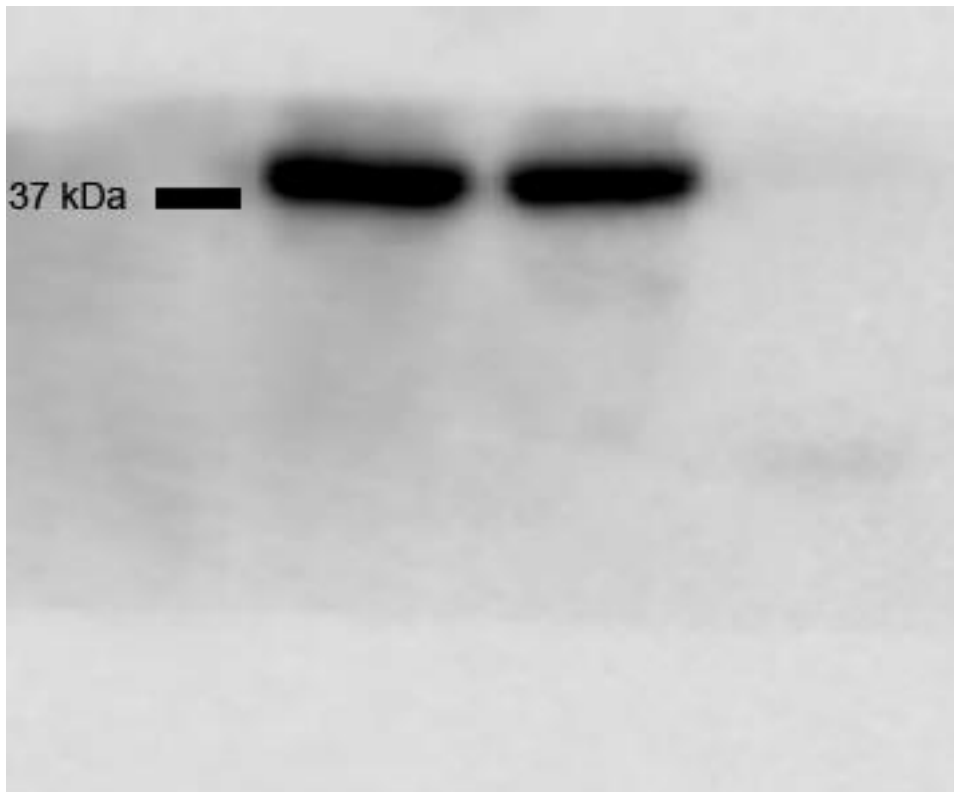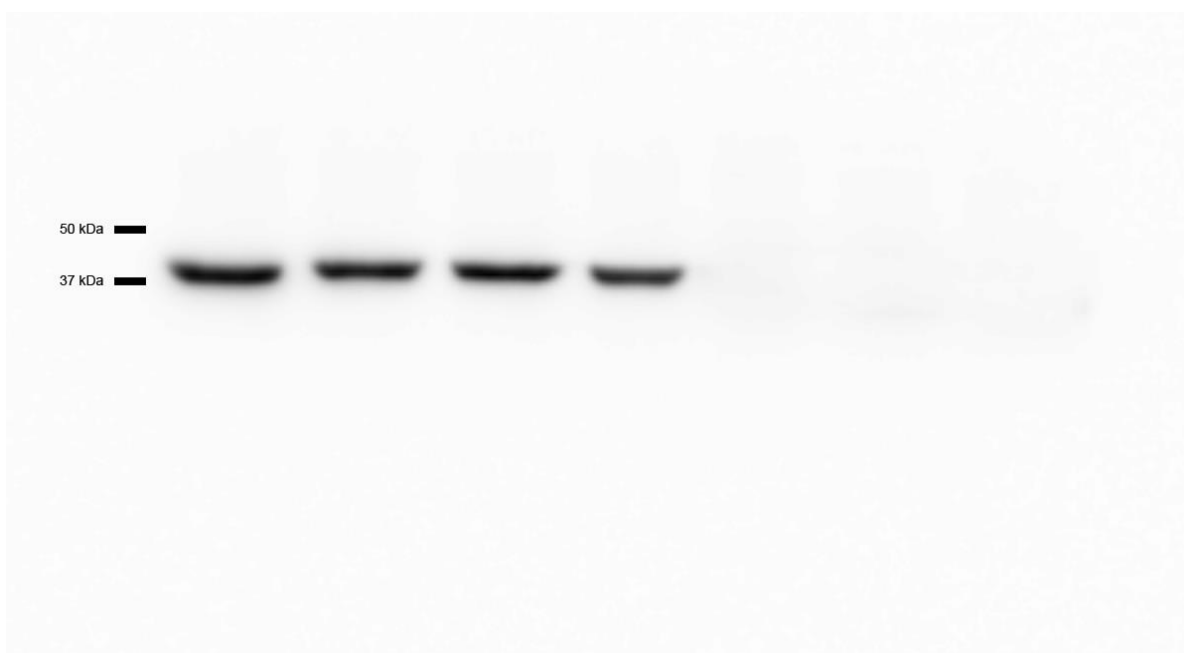

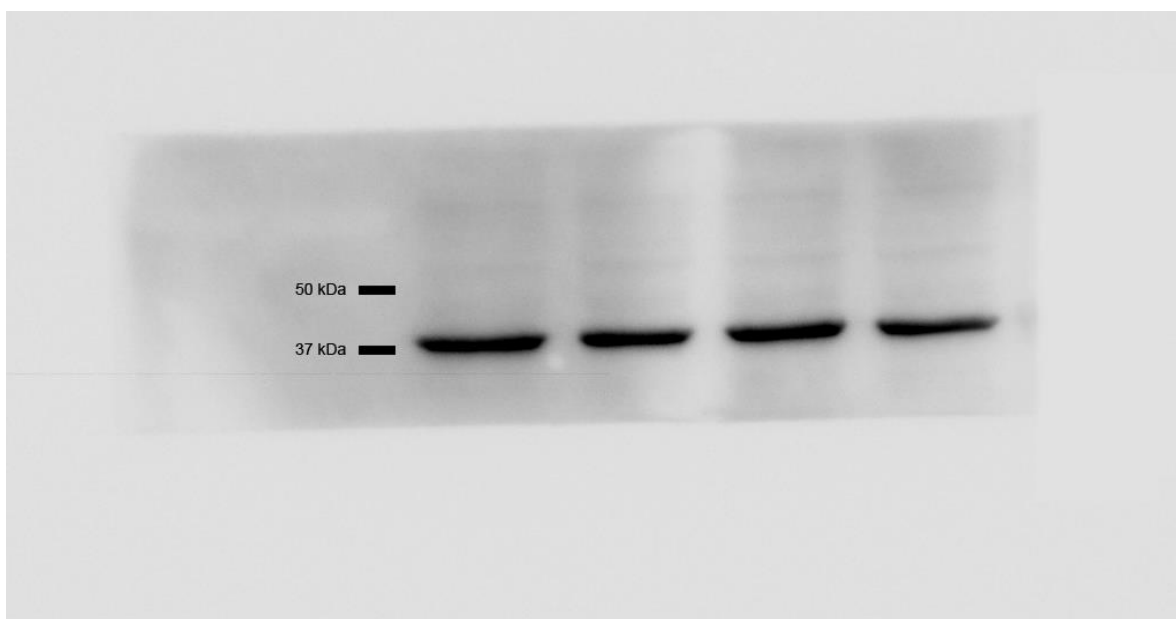

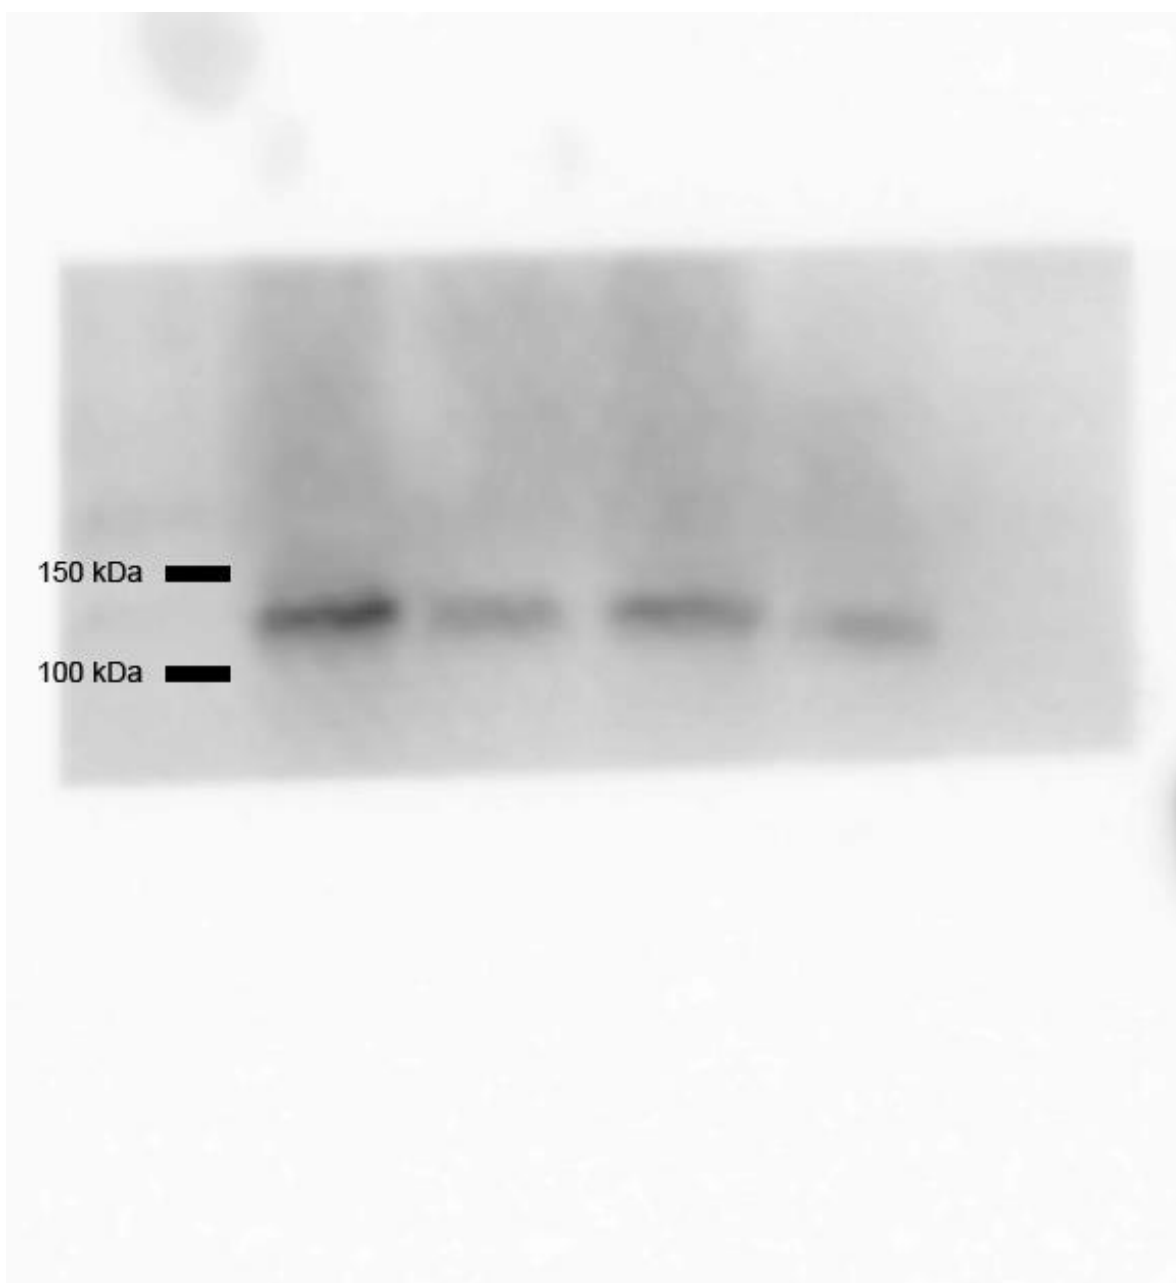

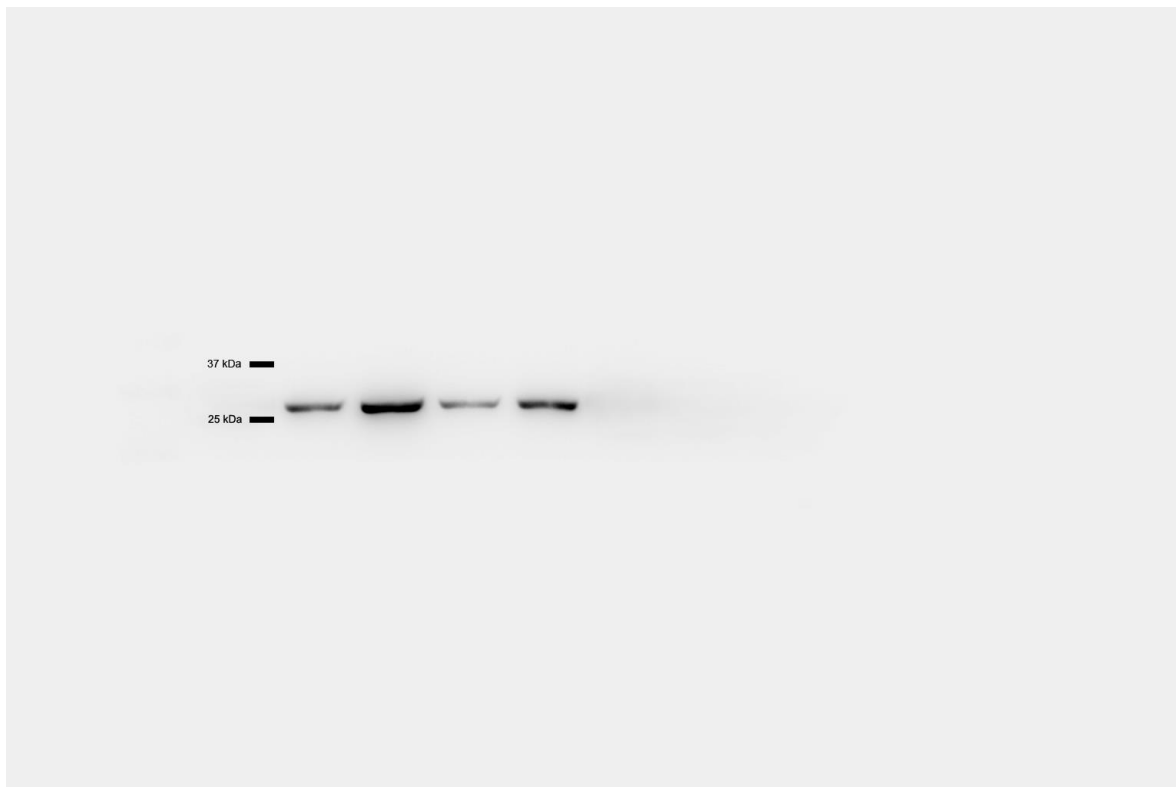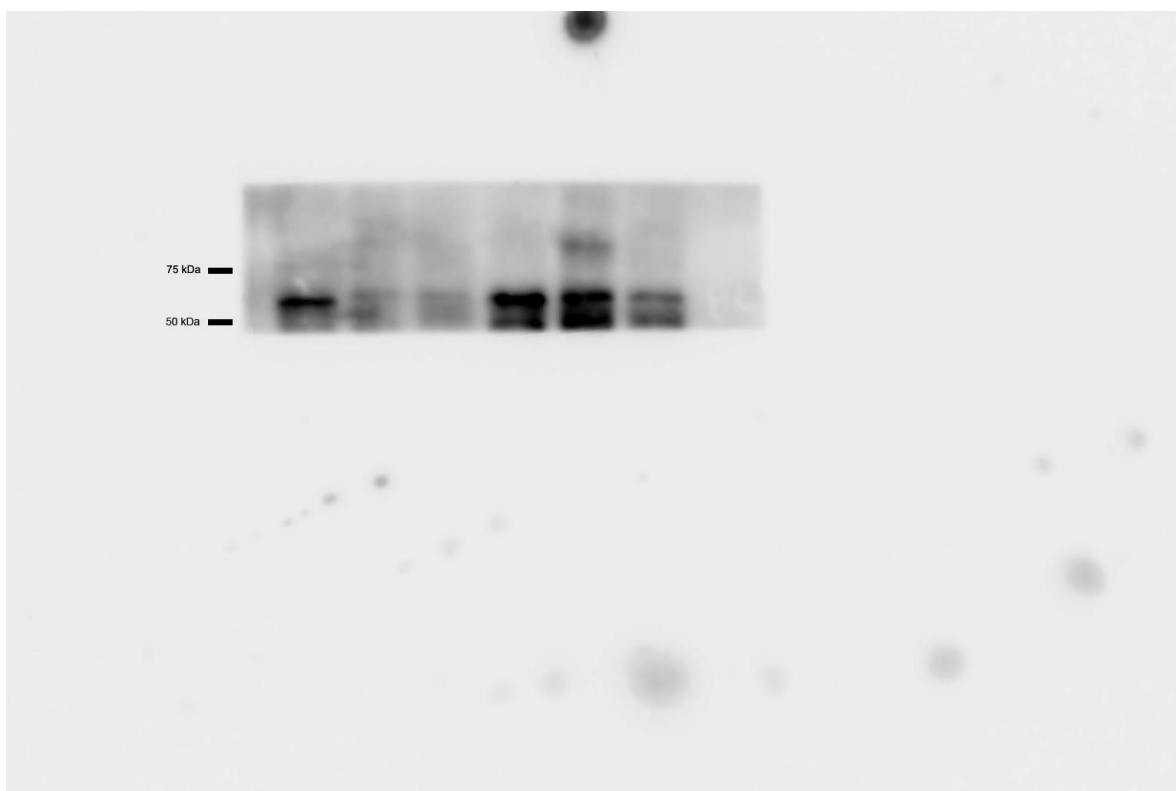

Supplement: s1 [file s1]
